1 **Title: Atypical septate junctions maintain the somatic enclosure around maturing**  
2 **spermatids and prevent premature sperm release in *Drosophila* testis.**

3

4 **Authors:** Pankaj Dubey<sup>†‡</sup>, Tushna Kapoor<sup>†</sup>, Samir Gupta, Seema Shirolikar and Krishanu  
5 Ray\*

6 <sup>†</sup> - contributed equally to the manuscript.

7 \*-Corresponding Author

8 **Affiliation:** Department of Biological Sciences, Tata Institute of Fundamental Research,  
9 Mumbai 400005, India.

10 **‡Current address:** Department of Pathology and Laboratory Medicine, University of  
11 Wisconsin-Madison, 1111 Highland Avenue, Wisconsin 53705, USA.

12 **Correspondence:** Phone: +91-22-22782730, Fax: +91-22-22804610

13 E-mails: [krishanu@tifr.res.in](mailto:krishanu@tifr.res.in) (KR), [krishanu64@gmail.com](mailto:krishanu64@gmail.com) (KR)

14

15 **Summary statement:** Dubey et al., showed that septate junctions stitch the somatic  
16 enclosure around maturing spermatids in *Drosophila* testis. Maintaining the integrity of  
17 this junction is essential for proper release of spermatids.

18

19

20 **Abstract**

21 Tight junctions prevent the paracellular flow and maintain cell polarity in an epithelium.  
22 These are also essential for maintaining the blood-testis-barrier involved in regulating  
23 sperm differentiation. Septate junctions are orthologous to the tight junctions in insects.  
24 In *Drosophila* testis, major septate junction components co-localize at the interface of  
25 germline and somatic cells initially and then condense between the two somatic cells in  
26 a cyst after germline meiosis. Their localization is extensively remodeled in subsequent  
27 stages. We find that characteristic septate junctions are formed between the somatic cyst  
28 cells at the elongated spermatid stage. Consistent with the previous reports, knockdown  
29 of essential junctional components, Discs-large-1 and Neurexin-IV, in the somatic cyst  
30 cells, during the early stages, disrupted sperm differentiation beyond the spermatocyte  
31 stage. Somatic knockdown of these proteins during the final stages of spermatid  
32 maturation caused premature release of spermatids inside the testes, resulting in partial  
33 loss of male fertility. These results indicate the importance of maintaining mechanical  
34 integrity of the somatic enclosure during spermatid coiling and release in *Drosophila*  
35 testis. It also highlights the functional similarity with the tight junction proteins during  
36 spermatogenesis in mammalian testes.

37

38 **Keywords:** Septate Junctions, Discs-large-1, Neurexin-IV, spermiation, Somatic Cyst  
39 Cells, *Drosophila*.

40

41 **Running Head:** Septate junctions facilitate spermiation

42

43

## 44 Introduction

45 Germ cell development requires appropriate microenvironment. In male germline,  
46 it is provided by the somatic-origin cells, *viz.*, the Sertoli cells in mammals, and the  
47 somatic cyst cells (SCCs) in *Drosophila* (Griswold, 1998; Zoller and Schulz, 2012). Both  
48 these cell types insulate developing germ cells from the body fluids, and thus, from the  
49 immune system. In mammals, this is accomplished by a specialized structure called the  
50 blood-testis-barrier (BTB) (Cheng and Mruk, 2012). Tight junctions (TJ) form an essential  
51 part of the BTB (Mruk and Cheng, 2015). In an epithelium, TJs restrict the paracellular  
52 flow of solutes from the lumen, as well as separate the apical and basolateral domains of  
53 the plasma membrane (Hartsock and Nelson, 2008). In testis, TJs between Sertoli cells  
54 at the BTB play a significant role in maintaining seminiferous tubule architecture, as well  
55 as the progression of spermatogenesis. In mice testis, knockout of Claudin-11 (*Cldn11*),  
56 an essential component of tight junctions in the testis, led to detachment of Sertoli cells  
57 from the basement membrane, thereby severely affecting the progression of  
58 spermatogenesis and the reproductive output (Mazaud-Guittot et al., 2010). Loss of  
59 another tight junction protein, Zona-occludens-2, from the Sertoli cells leads to  
60 mislocalization of a number of BTB proteins such as *Cldn11*, the gap junction protein-  
61 Connexin-43, and actin, which leads to loss of BTB integrity, and a decrease in male  
62 fertility (Xu et al., 2009). Together, these observations suggested that TJs maintain the  
63 integrity of the seminiferous tubule and the BTB.

64 Septate Junctions (SJs) in insects are considered to be the functional equivalent  
65 and evolutionary precursor to TJs (Banerjee et al., 2006). Both of these junctions require  
66 the Claudin family of proteins for the formation and maintenance of barrier function  
67 (Furuse et al., 1998a; Furuse et al., 1998b; Nelson et al., 2010; Wu et al., 2004). In  
68 *Drosophila*, SJs are identified by the typical, ladder-like arrangement of electron-dense  
69 elements at ~15 nm interval along the membrane interface between two epithelial cells  
70 (Banerjee et al., 2006; Locke, 1965). Structurally, SJs are classified into two types -  
71 pleated and smooth. Pleated SJs (pSJs) are found in ectoderm-derived epithelia. The  
72 pSJs have a typical ladder-like arrangement of electron-dense septa connecting the  
73 plasma membrane pair, while smooth SJs have a parallel arrangement (Banerjee et al.,

74 2006). Neuroglian (Nrg), Neurexin (NrxIV), Na<sup>+</sup>/K<sup>+</sup>-ATPase- $\alpha$ , Nervana (Nrv2), Lachesin  
75 (Lac), Disc large 1 (Dlg1), Coracle (Cora), and Fasciclin III (Fas III) constitute SJs in  
76 *Drosophila* (Banerjee et al., 2006; Woods et al., 1996). SJs play a critical role in  
77 developing tissue architecture and function. The homozygous *nrx* mutants fail to form a  
78 blood-nerve barrier due to the disruption of the SJs (Baumgartner et al., 1996). Loss of  
79 Dlg1 results in abnormal growth and fusion of imaginal discs (Woods and Bryant, 1989);  
80 while the loss of *cora* causes dorsal closure defects (Fehon et al., 1994). Also, N<sup>+</sup>/K<sup>+</sup>  
81 ATPase- $\alpha$  and nervana-2 are involved in tracheal tube size control, independent of their  
82 role in maintaining the diffusion barrier (Paul et al., 2003). These results further indicated  
83 that SJs are involved in both cell signaling and the maintenance of epithelial integrity.

84 In *Drosophila* testis, the spermatogonia develop inside an enclosure formed by two  
85 somatic-origin cyst cells (SCCs) that undergo extensive morphogenesis and ultimately  
86 differentiate into the Head (HCC) and Tail (TCC) cyst cells during spermatid elongation  
87 (Lindsley & Tokuyasu, 1980; White-Cooper, 2004). Each spermatid elongates to ~1.8 mm  
88 after meiosis inside the somatic enclosure in the testis. Subsequently, they are  
89 individualized, coiled and released into the seminal vesicle (SV) as mature sperm  
90 (Lindsley & Tokuyasu, 1980). As suggested previously (Fairchild et al., 2015), we found  
91 that critical components of SJs localize at the interface of SCCs during spermatid  
92 elongation. We also found that the junction migrates towards the caudal end of the  
93 enclosed spermatid head bundle after individualization, which confirmed an earlier  
94 prediction (Tokuyasu et al., 1972). Further, Transmission Electron Microscopy (TEM)  
95 analysis suggested that the SJs form between the SCCs after the spermatid  
96 individualization. The HCC-TCC association is likely to be subjected to high level of  
97 tension during the spermatid elongation, and subsequent differentiation. During this  
98 process, SJs could presumably impart mechanical stability balancing the tension at the  
99 HCC-TCC interface. We found that loss of Dlg1 in SCCs during the spermatid coiling and  
100 maturation could disrupt the localization of SJs components at the HCC-TCC interface  
101 and result in premature release of spermatids. Time-lapse imaging further indicated that  
102 the spermatids are likely to be released during the cyst rotation in the Terminal Epithelium  
103 (TE) region. Altogether, these observations suggest that the SJs between HCC and TCC  
104 form after the sperm individualization and that the junction is required to maintain the

105 mechanical integrity of the somatic cyst enclosure during its migration through TE before  
106 sperm release.

107

## 108 **Results**

109 To probe for the localization of SJ proteins at the cellular interfaces during  
110 spermatogenesis, we carried out a limited screen using protein trap lines and antibody  
111 staining of adult testis. We identified the SJs proteins –Nrg, Nr<sub>x</sub>-IV, Na<sup>+</sup>/K<sup>+</sup>-ATPase- $\alpha$ ,  
112 Nr<sub>v</sub>2, and Lac - at the soma-germline interface by using protein trap lines (green, Fig 1).  
113 Anti-Dlg-1 staining (red, Fig 1) of these testes preparations suggested that all the above  
114 SJ components colocalize with Dlg1 at all stages. Further, the pattern matched with that  
115 of the endogenous Dlg1-GFP (red, Fig 1) and Cora immunostaining (green, Fig 1). These  
116 SJ components localized at the germ-soma interface during the early stages, until the  
117 completion of meiosis (Fig 1A). We also found a condensed and prominent localization  
118 near the caudal end of the spermatid head bundles during the coiled stages, in the TE  
119 region (Fig 1B). Together, these results indicated that the cellular interface marked by  
120 these proteins undergoes extensive reorganization between the early and late stages of  
121 spermatogenesis.

122

## 123 **Morphogenesis of the cellular interfaces marked by SJs proteins during** 124 **spermatogenesis**

125 Next, we followed the morphogenesis of the SCC interfaces, using Nrg-GFP protein-trap,  
126 throughout all the stages of spermatogenesis (Fig 2A). Consistent with a previous report  
127 (Papagiannouli and Mechler, 2009), which analyzed the localization of Dlg, Nrg-GFP was  
128 found around all germ cells and SCCs at the early spermatogonial stages (Fig 2B,  
129 arrowheads and arrows). Nrg-GFP was mostly enriched around the entire cyst during the  
130 late spermatogonial (arrows, Fig 2B) and post-meiotic spermatocyte stages (arrows, Fig  
131 2C), indicating a gross reorganization of the junctions during these stages. The elongating  
132 stage cyst can be identified by polarized localization of sixty-four spermatid nuclei on one  
133 side and Spectrin caps (identified by  $\alpha$ -spectrin immunostaining) on the other (Ghosh-

134 Roy et al., 2004). Squash preparation of testis revealed localization of Nrg-GFP at the  
135 middle of the early elongating (Fig 2D), as well as in fully elongated cysts (Fig 2E).  
136 Consistent with an earlier report (Fairchild et al., 2015), these observations suggest that  
137 SJ proteins localize at the HCC-TCC boundary from the elongation stages onwards.

138 The compact localization of Nrg-GFP around the middle of the cyst persisted until  
139 the beginning of the individualization stage (arrowhead, Fig 2F). Post individualization,  
140 Nrg-GFP was found at the caudal end of compacted spermatid nuclei bundle (NB)  
141 (arrows, Fig 2G). Thus, the junction appeared to move towards the NB during  
142 individualization or early coiling stage. Time-lapse imaging in the mid-region of testis  
143 further indicated that occasionally an SJ moves towards the base (yellow and white  
144 arrowheads, Fig 2H; Movie S1). Nuclei bundles (NBs) of elongated spermatids within a  
145 cyst are positioned near the base of the testis and a compacted SJ forms in the middle of  
146 these cysts (Figure 2I). The spermatid tails coil up after individualization, and the SJ is  
147 repositioned near the rostral end of the NB between the HCC and TCC. Therefore, the  
148 SJ movement towards the base may suggest a reorganization of the HCC and TCC  
149 morphology, either before or during coiling. Previously, TEM studies predicted that the  
150 junction is repositioned during individualization or late coiling stage and that this  
151 movement coincides with the condensation of the HCC towards the spermatid head  
152 bundle and expansion of TCC to cover the entire tail bundle (Tokuyasu et al., 1972). Our  
153 results provide experimental proof of this previously proposed model.

154

### 155 **SJs were first observed between the somatic cyst cells during the elongated** 156 **spermatid stage**

157 We further examined the cellular interfaces using TEM in wild-type testis. The germline  
158 and somatic cell interfaces during the pre-elongation stages revealed no specific electron-  
159 dense structures (Fig 3A-A'). We were not able to identify any SJs during pre-meiotic  
160 stages. Some electron-dense structures were seen between the SCCs around the  
161 elongated spermatids (arrow, Fig 3B-B'). More prominent electron dense patterns,  
162 resembling the septate junctions, were found around the tails of fully elongated  
163 spermatids containing major and minor mitochondrial derivatives around the axoneme

164 (arrows, Fig 3C-C'). These electron-dense SJs were also found near the nuclei of  
165 compacted spermatid head bundles at the base of the testis, which is characteristic of the  
166 post-individualized stages (arrow, Fig 3D-D'). Together with the previous results  
167 (Tokuyasu et al., 1972), these observations further suggested that SJs are formed  
168 between the somatic cells, the HCC and TCC, during spermatid elongation and  
169 maintained in subsequent stages.

170

### 171 **Knock-down of Dlg1 and NrX-IV in the somatic cyst cells at an early stage** 172 **arrested post-meiotic differentiation**

173 In adult *Drosophila* testis, Cora and NrX IV in the SCCs are essential for forming a  
174 functional germ-soma permeability barrier and for further germline differentiation  
175 (Fairchild et al., 2015). However, as discussed earlier, SJ proteins also have roles other  
176 than serving as a diffusion barrier. For instance, a significant number of pole cells in the  
177 *Dlg1* homozygous mutant embryos fail to reach the gonadal pockets. Further, the male-  
178 specific mesoderm cells expressing Sox100B fail to get incorporated into the male gonad  
179 in stage-15 embryos (Papagiannouli, 2013). In *Dlg1* homozygous mutant larvae, the  
180 Eyes-absent (Eya)-positive SCCs were reduced, and apoptosis was induced in the 16-  
181 cell spermatocyte cysts, indicating a role of Dlg in somatic differentiation, as well as for  
182 the survival and differentiation of germ cells (Papagiannouli and Mechler, 2009). Although  
183 the *tj-Gal4* mediated knockdown of Dlg1 in the SCCs during the spermatogonial stages  
184 disrupted the cyst permeability barrier and arrested differentiation, it did not affect the  
185 transit amplifying divisions of the spermatogonia (Gupta et al., 2018). Hence, we  
186 conjectured that in addition to maintaining the barrier function, the somatic Dlg1 activity  
187 might specifically regulate the transition to the meiotic stages in the male germline.

188 To further understand the role of the SJs during the spermatogonia to  
189 spermatocyte transition, we knocked down two essential components of the junction, Dlg1  
190 and NrX-IV using *eya-Gal4*, which expresses in both the somatic cyst cells from the 4-cell  
191 spermatogonial stage onwards (Fig S1A, A') (Fabrizio et al., 2003; Leatherman and Di  
192 Nardo, 2008). The *eya-Gal4*> *dsGFP* testis contained tightly packed, mitotically-active,  
193 spermatogonial cells with condensed chromatin at the apex (arrows, Fig 4A, B). The

194 chromatin was decondensed at the subsequent spermatocyte stages (arrowheads, Fig  
195 4B). In the *eya-Gal4> dsDlg1* testes, the apical ends of testes appeared shrunk (Fig 4D-  
196 E), and Dlg1 immunostaining was limited to the germline cells (Fig 4E'). The testis was  
197 mostly filled with germ cells having compact chromatin morphology (Fig 4E). It was  
198 difficult to distinguish individual cysts in these testes, and there were very few elongated  
199 spermatids, as compared to control (Fig 4C, F). The Eya immunostaining, however,  
200 appeared in the SCCs at appropriate region of the testis (Fig 4C, F'), indicating that loss  
201 of Dlg1 may not affect the *eya* expression. In contrast, immunostaining with the other  
202 somatic marker Traffic-jam (TJ), which is expressed in the early population of somatic  
203 cyst cells in the control testis (Fig 4G-H) (Hudson et al., 2013; Li et al., 2003), revealed  
204 abnormal expansion of the staining in the Nr<sub>x</sub>-IV knockdown testes (Fig 4I-J). Together,  
205 these results confirmed that loss of Dlg1 and Nr<sub>x</sub>-IV from the SCCs during the mitotic-  
206 meiotic transition also blocks differentiation beyond the early spermatogonial stages.

207

## 208 **Knockdown of SJs during the coiling stages disrupted spermatid bundles**

209 To determine the role of the SJs in the post-meiotic stages, we used *PpY-Gal4*,  
210 which expresses in the somatic cyst cells after meiosis (arrowhead, Fig S1B-B'; Jung et  
211 al., 2007; ). We found that expression of *PpY-Gal4> dsDlg1* abolished Dlg1 staining from  
212 the HCC-TCC interface in the cysts only in the TE region (Fig S2), suggesting Dlg1 is  
213 effectively knocked-down at the terminal stages by the dsRNA expression. Knockdown  
214 of Dlg1 also led to the loss of Coracle staining around the compact NBs in the TE region  
215 (Fig S2F). These results suggest that SJs may be disrupted during the terminal stage of  
216 spermiation due to the *PpY-Gal4*-mediated expression of the *dsDlg1*. We found that the  
217 number of intact NBs in the TE region were significantly reduced (Fig 5A-C, I) and an  
218 unusually large number of free spermatid heads (insets, Fig 5A-C) were found at the base  
219 of the testes. Corresponding bright field images revealed improperly coiled spermatid tails  
220 (Fig 5D-F). In comparison, the morphology of the early and progressed individualization  
221 complexes (ICs) were normal in these testes (Fig S3). The occurrences of early ICs (Fig  
222 5G), as well as the number of mature spermatid head bundles (NBs) outside the TE zone  
223 (Fig 5H), considered as the indicators of successful completion of spermatid elongation



224 (Ghosh-Roy et al. 2005), was unaffected. These results indicated that the SJs proteins  
225 are required in the SCCs to maintain the spermatids in tightly bundled and coiled form. A  
226 similar disruption of the spermatid bundle due to loss of F-actin assembly was shown to  
227 affect spermatid release earlier (Dubey et al., 2016).

228

### 229 **Knockdown of *Dlg1* in SCCs during spermatid coiling induced the premature** 230 **release of spermatids within the testis**

231 The cyst rotates after entering the TE and the rostral end of the NB of coiled spermatids  
232 orients away from the seminal vesicle (SV) at the time of release (Dubey et al., 2016).  
233 Time-lapsed imaging also showed that the spermatids are pulled back from the HCC with  
234 their tails leading during the release (Movie S2), and the SJs between HCC and TCC  
235 remains intact during the release (Dubey et al., 2016). To identify whether the loss of SJs  
236 in the SCCs during spermatid coiling could lead to the abnormal release, we estimated  
237 the orientation of intact spermatid head bundles (NBs) in the TE region in the *Dlg1* RNAi  
238 background. In control testes, NBs found at the 100-200  $\mu\text{m}$  distance from the SV were  
239 oriented with equal propensity both towards (arrowheads, Fig 6A) and away (stars, Fig  
240 6A) from the SV (black and grey bars, Fig 6C). In comparison, the majority of the NBs in  
241 the 200-300  $\mu\text{m}$  zone were found oriented towards the SV (Fig 6C). In the *Dlg1* RNAi  
242 background, a significant fraction of the relatively fewer NBs found in the 100-200  $\mu\text{m}$   
243 zone remained oriented towards the SV (arrowheads, Fig 6B; dark and bright red bars;  
244 Fig 6C). The distribution in the more distal zone (200-300  $\mu\text{m}$  from SV) was similar to the  
245 control (Fig 6C). In addition, we observed a large number of single spermatid heads in  
246 the TE region. Together, these observations suggest that loss of *Dlg1* in the SCCs  
247 disrupted NBs during cyst rotation inside the TE before sperm release.

248 To confirm the conjecture, we captured time-lapse images from whole testis *ex-*  
249 *vivo*. The spermatid heads were labeled with ProtamineA-GFP and cyst cell membrane  
250 was labeled with *PpY-Gal4 > mCD8-RFP* in both the control (*UAS-Dicer*) and *dlg1* RNAi  
251 (*UAS-dsDlg1*) backgrounds. In the control testes, the NBs always retracted from the HCC  
252 during release in the direction of the SV (n = 3, Fig 6D; Movie S2). In the *dlg1* RNAi  
253 background, the spermatid heads retracted even though they were not facing away from

254 the SV (n = 3, Fig 6E; movie S3). As a result, they were released prematurely inside the  
255 TE region. Hence, we conclude that the loss of Dlg1 in SCCs leads to loss of the SJs  
256 between the HCC and TCC, and that the integrity of this junction is critical to prevent cyst  
257 disruption and premature sperm release within the testis.

258 To understand the implications of the mechanical stability of the cyst enclosure  
259 during spermiation on male reproductive fitness, we carried out a fertility test. Individual  
260 males expressing the *GFP<sup>dsRNA</sup>* (control) and *Dlg1<sup>dsRNA</sup>* transgenes under *PpY-Gal4* were  
261 allowed to mate for 24 hours with three wild-type virgins each, and the number of pupae  
262 was counted. The results indicated that fertility of the *dlg1* RNAi males was significantly  
263 lower as compared to control males (Fig 6F). Together with the observation of the time-  
264 lapsed images, this result suggests that the premature release is detrimental to the male  
265 reproductive fitness.

266

## 267 **Discussion:**

268

### 269 **SJs between the somatic cyst cells are remodeled during spermatid maturation**

270 The cyst capsule undergoes extensive changes in cell shape and size during the  
271 development of germ cells from the spermatogonial to coiled spermatid stages. The cyst  
272 has to maintain the enclosure to ensure proper differentiation of the germ cells. How the  
273 cyst manages to keep the enclosure intact during spermatogenesis was not known.  
274 Based on TEM observations, Tokuyasu reported the presence of septate junctions during  
275 late stages of *Drosophila* spermatogenesis (Tokuyasu et al., 1972). More recently, the SJ  
276 proteins Cora and NrX-IV were shown to localize around the cyst during the early  
277 spermatogonial stages, and knockdown of these proteins at these stages led to an arrest  
278 in differentiation (Fairchild et al., 2015). In this study, we provided a systematic description  
279 of the septate junction morphogenesis during sperm development. Using Nrg-GFP as a  
280 marker, we showed that the SJs formed between the SCCs are dynamically rearranged  
281 towards the later stages before spermiation. During the spermatogonial stages, the SJ  
282 proteins are localized on both the germ cells and somatic cell membrane, while from the

283 spermatocyte stages, these proteins are restricted to the SCCs. During the early  
284 elongated stages, the SJs proteins accumulate at the boundary between the HCC and  
285 TCC. This boundary localization remains until the coiled stages of spermatogenesis.  
286 Ultimately, the sperms release without breaching the SJ between the SCCs (Dubey et al.,  
287 2016), indicating that sperm release may take place due to a breach in the TCC.

288 A similar reorganization of SJ proteins has been described during *Drosophila*  
289 embryogenesis. It was shown that in epithelial cells of the trachea, until stage 13, SJ  
290 components localize all along the basolateral edges, and by stage 15 they are localized  
291 exclusively to the apico-lateral domain (Tiklová et al., 2010). Similarly, other studies have  
292 shown that until stage 15, Cora localizes all along the basolateral domain of the cells of  
293 the salivary gland, and post stage 15, they localize to the apico-lateral domain (Hall and  
294 Ward, 2016). Permeability experiments also suggest that the occluding property of SJs is  
295 attained by stage 15 (Paul et al., 2003). Ultrastructural studies show that mature SJs are  
296 formed by stage 16-17 (Tepass and Hartenstein, 1994). Together these observations  
297 suggested that a more diffuse localization of SJ components along the cell membrane is  
298 followed by the assembly of a compact, mature and functional occluding junction at a later  
299 stage.

300 In the testis, however, the SJ proteins are localized on both the germline and  
301 somatic cell membrane during the spermatogonial stages, and the somatic permeability  
302 barrier is established from the 4-cell stage. Loss of the SJ components- Dlg1, NrX-IV, and  
303 Cora- from the germ-soma interface during this period disrupted the permeability barrier  
304 and affected subsequent differentiation to the spermatocyte stage (Fairchild et al., 2015;  
305 Gupta et al., 2018). A similar loss of permeability due to the knockdown of Armadillo/ $\beta$ -  
306 catenin, however, did not appear to affect the immediate differentiation to the  
307 spermatocyte stage (Gupta et al., 2018). Therefore, the SJ proteins Dlg1, Cora, and NrX-  
308 IV are likely to regulate the germline differentiation independent of their role in  
309 establishing the barrier function. Due to the distinctive morphogenetic profiles of the  
310 cellular interfaces, one could also recognize that the SJ proteins relocalize after meiosis  
311 to a new interface between the SCCs during spermatid elongation and this association is  
312 retained all through the remaining period of spermatid differentiation.

### 313 **Atypical SJs forms only after meiosis and during spermatid elongation**

314 In concurrence with a previous report (Tokuyasu et al., 1972), the TEM data also  
315 suggested that a ladder-like, septate pattern is formed after the elongation stages, and  
316 we do not find the presence of SJs during mitotic and meiotic stages. In the mammalian  
317 testis, the BTB is formed after the mitotic stages, and it serves to provide an isolated  
318 environment to the meiotic and post meiotic population (Mruk and Cheng, 2015). We  
319 could not find any SJ-like feature between the germ cells or at the germ-soma interface  
320 during the early stages. The first electron-dense material appeared at the interface of the  
321 SCCs encapsulating elongated spermatids. Therefore, SJs are unlikely to contribute to  
322 establishing the permeability barrier during the spermatogonial stages.

323 After the reorganization, SJ proteins localize at the HCC-TCC interface, which is  
324 further compacted during spermatid individualization. Classically, TJs and SJs localize in  
325 a tight band at the apicolateral domains of an epithelium, thereby stitching the neighboring  
326 cells together. In comparison, the SJs formed between two cyst cells (HCC and TCC) is  
327 extended along the entire cellular interface. In this way, they seal the enclosure formed  
328 by the head-to-head association of two SCCs, which is distinct from the interactions  
329 established by these junctions in a monolayer. Due to this unusual arrangement, we call  
330 this an atypical septate junction. The junction moves from the middle of the elongated  
331 cyst towards the base of the NB during the coiling stages. This kind of the extensive  
332 morphogenesis is unique to *Drosophila* testis. It indicated substantial morphological  
333 restructuring of the HCC and TCC during this period. Previously, TEM analysis of testis  
334 sections suggested that the movement of the junction and reshaping of the cyst cells may  
335 occur during individualization or early coiling stage (Tokuyasu et al., 1972). Our results  
336 obtained from time-lapse imaging of live testis preparations support this hypothesis and  
337 provides experimental proof for the repositioning of the junction.

338

339

340

341 **SJs between the Head and Tail cyst cells provide mechanical stability to the**  
342 **somatic enclosure during spermatid coiling**

343 Although *PpY-Gal4* is expressed in the SCCs from the post-mitotic stages (Jung et al.,  
344 2007), the *PpY-Gal4*-mediated expression of *dsDlg1* could only eliminate the protein from  
345 the SCCs at the last stage of spermatid maturation, when the cyst entered the TE. It  
346 increased the propensity of premature spermatid release inside the testis. Time-lapse  
347 analysis indicated that these releases occurred at an unusual orientation. Together, these  
348 observations suggest that the turning of the cyst is a mechanically stressful event which  
349 can only be accomplished if the cyst cells are tightly adherent. SJs are classically thought  
350 to provide a fluid access barrier across an epithelium. However, the evidence from  
351 *Drosophila* testis could also suggest a role in providing mechanical stability. In mice testis,  
352 knockdown of claudin-11 led to sloughing off the Sertoli cells from the seminiferous  
353 tubule, indicating that the TJs are required to maintain structural integrity in an epithelium  
354 (Mazaud-Guittot et al., 2010). Recently, it has been seen in *Xenopus* embryos that loss  
355 of TJ proteins leads to an increase in tension on Adherens junctions during cytokinesis  
356 (Hatte et al., 2018). Therefore, apart from serving the barrier properties, SJs and TJs may  
357 also help in generating tissue resistance to mechanical strain which is essential for  
358 maintain organ shape and integrity during development and in adult stages.

359

360 **Materials and Methods**

361 ***Drosophila* stocks and culture conditions-**

362 All *Drosophila* stocks and crosses were maintained at standard cornmeal *Drosophila*  
363 medium at 25 °C. Freshly emerged flies are separated from females and were allowed to  
364 age for 2-4 days before dissection. For RNAi experiments, the freshly emerged males  
365 were kept at 28 °C to increase the penetrance of the RNAi. The list of the stocks and their  
366 sources are listed in the supplemental Table S1. We thank the *Drosophila* community for  
367 their generous gift of the fly stocks.

368

## 369 **Fertility assay**

370 Each freshly emerged, *PpY-Gal4> dsGFP* (control) and *PpY-Gal4> dsDlg* males were  
371 kept with three Canton-S females for four days at 28 °C to allow for accumulated sperm  
372 to be cleared out. On the fourth day, each of these males was extracted and mated with  
373 three fresh virgin females (Canton-S) for 24 hours at 28 °C in separate vials. Then all the  
374 flies were discarded. Subsequently, the number of pupae in the vial were counted as a  
375 measure of the male fertility.

## 376 **Immunostaining**

377 For whole mount immunostaining, the testes were dissected in 1X PBS followed by  
378 fixation in 4% Para-formaldehyde (PFA) for 30 mins-1 hour at room temperature. Post-  
379 fixation, testes were washed with PTX (0.3% Triton-X in PBS), three times, 10 mins each.  
380 After washing, the samples were incubated with Primary antibody diluted in PTX overnight  
381 at 4 °C. The primary antibody solution was washed off with PTX, and samples were  
382 incubated with Alexa-dye tagged secondary antibodies (Invitrogen) for 2-4 hours at room  
383 temperature. After washing, samples were stained with 0.001% Hoechst 33342 (Sigma  
384 Chemical Co. USA), and 10 µM Phalloidin-Atto568/647 (Sigma Chemical Co. USA) for  
385 30 mins, washed and mounted in Vectashield® mounting medium (Vector Laboratory  
386 Inc., USA) on a glass slide. For testis squash preparation, the testes were dissected and  
387 kept in 50 µl of PBS on a glass slide. A coverslip was placed on top of the sample and  
388 gently pressed against the slide. Extra PBS was removed, and the slide was plunged into  
389 liquid nitrogen for two minutes. After removing the coverslip, making sure the sample  
390 remains on the slide, the slide was then incubated with 95% ethanol, followed by fixation  
391 in 4% PFA for an hour. Further processing is same as described for whole mount  
392 immunostaining. The primary antibodies used are as follows: Anti-Dlg1 (4F3, DSHB;  
393 1:100), Anti-Cora (C615.16, DSHB; 1:100), Anti-Vasa (DSHB; 1:50), Alpha-spectrin (3A9,  
394 DSHB; 1:100), Anti-Eya (eya10H6, DSHB; 1:100) and Anti-tj (Dorothea Godt, University  
395 of Toronto, Canada; 1:1000).

396

397

## 398 **Transmission electron microscopy**

399 Three to Four days old CantonS flies were dissected in 1X PBS and fixed for 4-6 hours,  
400 with Karnovsky's fixative (pH-7.4) at room temperature. Samples were washed with 100  
401 mM phosphate buffer (pH-7.4), then post-fixed with  $K_2Cr_2O_7$ - $OsO_4$  mixture for 2 hours on  
402 ice, which was followed by 1-hour incubation at room temperature. After 3 to 5 washes in  
403 100 mM phosphate buffer, the specimens were dehydrated in a graded series of ethanol  
404 and propylene oxide. Finally, they were embedded in Durcupan (Fluka, Electron  
405 Microscopy Sciences, USA) epoxy resin mix prepared according to the manufacturer  
406 protocol and polymerized at 60°C overnight. Specimens were then sectioned with a glass  
407 and diamond knife on LEICA-EM-UC6 (Leica Microsystems, Germany). Ultrathin sections  
408 were collected on Formvar-carbon coated copper slots. These sections were examined  
409 on Libra120EFTEM Transmission Electron microscope (Carl Zeiss AG, Germany).

## 410 **Image Analysis and Quantification**

411 Images were acquired using Olympus FV1000SPD and FV3000SPD Laser scanning  
412 confocal microscopes (Olympus Co., Japan). Live Imaging was performed on  
413 FV1000SPD, as described by (Dubey et al., 2016). The images were analyzed using Fiji-  
414 ImageJ (<http://fiji.sc/Fiji>). The pair-wise significance of difference (p-value) was estimated  
415 using the Mann-Whitney U-test.

416

417 **Acknowledgments:** We thank Lalit Borde for the help with the TEM imaging; Prof. John  
418 Belote, Syracuse University, NY, USA; Prof. Benny Shilo, Weizmann Inst., Israel, and Dr.  
419 Dorothea Godt, University of Toronto, Canada for reagents. We acknowledge the Fly  
420 facility at the National Centre for Biological Sciences (NCBS), Bangalore, India;  
421 Bloomington Drosophila Stock Centre (BDSC), Indiana USA; and Vienna Drosophila  
422 Resource Centre (VDRC), Austria; for fly stocks; and Developmental Studies Hybridoma  
423 Bank, Iowa for antibodies. We also thank Prof. M. Narasimha and KR lab members for  
424 the assistance with various reagents and stocks. The research was supported by an  
425 intramural grant of TIFR, DAE, Govt. of India.

426

427 **Author contributions:** PD and KR conceived the project and planned experiments. PD  
428 and TK carried out the experiments and compiled the figures. SG and SS contributed the  
429 TEM data. KR wrote the manuscript with help from PD and TK.

430 **Competing interests:** The authors have no competing or financial interests in publishing  
431 this paper.

432

## 433 **References**

434 **Banerjee, S., Sousa, A. D. and Bhat, M. A.** (2006). Organization and Function of Septate  
435 Junctions. **46**, 65–77.

436 **Baumgartner, S., Littleton, J. T., Broadie, K., Bhat, M. A., Harbecke, R., Lengyel, J.**  
437 **A., Chiquet-ehrisman, R., Prokop, A., Bellen, H. J. and Miescher-institute, F.**  
438 (1996). A Drosophila Neurexin Is Required for Septate Junction and Blood-Nerve  
439 Barrier Formation and Function. **87**, 1059–1068.

440 **Cheng, C. Y. and Mruk, D. D.** (2012). The Blood-Testis Barrier and Its Implications for  
441 Male Contraception. *Pharmacol. Rev.* **64**, 16–64.

442 **Dubey, P., Shirolikar, S. and Ray, K.** (2016). Localized, Reactive F-Actin Dynamics  
443 Prevents Abnormal Somatic Cell Penetration by Mature Spermatids. *Dev. Cell* **38**,  
444 507–521.

445 **Fabrizio, J. J., Boyle, M. and DiNardo, S.** (2003). A somatic role for eyes absent (*eya*)  
446 and sine oculis (*so*) in Drosophila spermatocyte development. *Dev. Biol.* **258**, 117–  
447 128.

448 **Fairchild, M. J., Smendziuk, C. M. and Tanentzapf, G.** (2015). A somatic permeability  
449 barrier around the germline is essential for Drosophila spermatogenesis.  
450 *Development* **142**, 268–281.

451 **Fehon, R. G., Dawson, I. A. and Artavanis-Tsakonas, S.** (1994). A Drosophila  
452 homologue of membrane-skeleton protein 4.1 is associated with septate junctions  
453 and is encoded by the coracle gene. *Development* **120**, 545–557.



- 454 **Furuse, M., Fujita, K., Hiiragi, T., Fujimoto, K. and Tsukita, S.** (1998a). Claudin-1 and  
455 -2: novel integral membrane proteins localizing at tight junctions with no sequence  
456 similarity to occludin. *J. Cell Biol.* **141**, 1539–50.
- 457 **Furuse, M., Sasaki, H., Fujimoto, K. and Tsukita, S.** (1998b). A single gene product,  
458 claudin-1 or -2, reconstitutes tight junction strands and recruits occludin in fibroblasts.  
459 *J. Cell Biol.* **143**, 391–401.
- 460 **Ghosh-Roy, A., Kulkarni, M., Kumar, V., Shirolkar, S. and Ray, K.** (2004).  
461 Cytoplasmic Dynein – Dynactin Complex Is Required for Spermatid Growth but Not  
462 Axoneme Assembly in. **15**, 2470–2483.
- 463 **Ghosh-Roy, A., Desai, B. S., Ray, K.** (2005). Dynein Light Chain 1 Regulates Dynamin-  
464 mediated F-Actin Assembly during Sperm Individualization in *Drosophila*. **16**, 3107–  
465 3116.
- 466 **Griswold, M. D.** (1998). The central role of Sertoli cells in spermatogenesis. **9**, 411-416
- 467 **Gupta, S., Varshney, B., Chatterjee, C., Ray, K.** (2018) Somatic ERK activation during  
468 the transit amplification is essential for maintaining the synchrony of germline divisions in  
469 *Drosophila testis*. *O.Bio* (in press)
- 470
- 471 **Hall, S. and Ward, R. E.** (2016). Septate Junction Proteins Play Essential Roles in  
472 Morphogenesis Throughout Embryonic Development in *Drosophila*. *G3-Genes*  
473 *Genomes Genet.* **6**, 2375–2384.
- 474 **Hartsock, A. and Nelson, W. J.** (2008). Adherens and Tight Junctions: Structure,  
475 Function and Connection to the Actin Cytoskeleton. *Biochim Biophys Acta* **1778**,  
476 660–669.
- 477 **Hatte, G., Prigent, C. and Tassan, J.-P.** (2018). Tight junctions negatively regulate  
478 mechanical forces applied to adherens junctions in vertebrate epithelial tissue. *J. Cell*  
479 *Sci.* **131**, jcs208736.
- 480 **Hudson, A. G., Parrott, B. B., Qian, Y. and Schulz, C.** (2013). A Temporal Signature of  
481 Epidermal Growth Factor Signaling Regulates the Differentiation of Germline Cells

- 482 in Testes of *Drosophila melanogaster*. *PLoS One* **8**: e70678
- 483 **Jung, A., Hollmann, M. and Schafer, M. A.** (2007). The fatty acid elongase NOA is  
484 necessary for viability and has a somatic role in *Drosophila* sperm development. *J.*  
485 *Cell Sci.* **120**, 2924–2934.
- 486 **Leatherman, J. L. and Di Nardo, S.** (2008). Zfh-1 controls somatic stem cell self-renewal  
487 in the *Drosophila* testis and nonautonomously influences germline stem cell self-  
488 renewal. *Cell Stem Cell* **3**, 44–54.
- 489 **Li, M. A., Alls, J. D., Avancini, R. M., Koo, K. and Godt, D.** (2003). The large Maf factor  
490 traffic jam controls gonad morphogenesis in *Drosophila*. *Nat. Cell Biol.* **5**, 994–1000.
- 491 **Lindsley, D. I. and Tokuyasu, K. T.** (1980). Spermatogenesis. In *Genetics and Biology*  
492 of *Drosophila*, 2nd edn (ed. M. Ashburner and T. R. Wright), pp. 225-294. New York:  
493 Academic Press.
- 494 **Locke, M.** (1965). The structure of septate desmosomes. *J. Cell Biol.* **25**, 166–169.
- 495 **Mazaud-Guittot, S., Meugnier, E., Pesenti, S., Wu, X., Vidal, H., Gow, a and Le**  
496 **Magueresse-Battistoni, B.** (2010). Claudin 11 deficiency in mice results in loss of  
497 the Sertoli cell epithelial phenotype in the testis. *Biol. Reprod.* **82**, 202–213.
- 498 **Mruk, D. D. and Cheng, C. Y.** (2015). The mammalian blood-testis barrier: Its biology  
499 and regulation. *Endocr. Rev.* **36**, 564–591.
- 500 **Nelson, K. S., Furuse, M. and Beitel, G. J.** (2010). The *Drosophila* claudin Kune-kune  
501 is required for septate junction organization and tracheal tube size control. *Genetics*  
502 **185**, 831–839.
- 503 **Papagiannouli, F.** (2013). The internal structure of embryonic gonads and testis  
504 development in *Drosophila melanogaster* requires scrib, lgl and dlg activity in the  
505 soma. *Int. J. Dev. Biol.* **57**, 25–34.
- 506 **Papagiannouli, F. and Mechler, B. M.** (2009). discs large regulates somatic cyst cell  
507 survival and expansion in *Drosophila* testis. *Cell Res.* **19**, 1139–49.
- 508 **Paul, S. M., Ternet, M., Salvaterra, P. M. and Beitel, G. J.** (2003). The Na<sup>+</sup> / K<sup>+</sup>

- 509 ATPase is required for septate junction function and epithelial tube-size control in the  
510 *Drosophila* tracheal system. *Development*. **130**, 4963–4974.
- 511 **Tepass, U. and Hartenstein, V.** (1994). The development of cellular junctions in the  
512 *Drosophila* embryo. *Dev. Biol.* **161**, 563–596.
- 513 **Tiklová, K., Senti, K. A., Wang, S., GräCurrency Signslund, A. and Samakovlis, C.**  
514 (2010). Epithelial septate junction assembly relies on melanotransferrin iron binding  
515 and endocytosis in *Drosophila*. *Nat. Cell Biol.* **12**, 1071–1077.
- 516 **Tokuyasu, K. T., Peacock, W. J. and Hardy, R. W.** (1972). Dynamics of spermiogenesis  
517 in *Drosophila melanogaster*. II. Coiling process. *Zeitschrift für Zellforsch. und*  
518 *Mikroskopische Anat.* **127**, 492–525.
- 519 **White-cooper, H.** (2004) Spermatogenesis: analysis of meiosis and morphogenesis. In:  
520 Henderson D, editor. *Methods in molecular biology*. Totowa, NJ: Humana Press.  
521 pp45-75. doi: 10.1385/1-59259665-7:45-
- 522 **Woods, D. F. and Bryant, P. J.** (1989). Molecular cloning of the lethal(1)discs large-1  
523 oncogene of *Drosophila*. *Dev. Biol.* **134**, 222–235.
- 524 **Woods, D. F., Hough, C., Peel, D., Callaini, G. and Bryant, P. J.** (1996). Dig Protein Is  
525 Required for Junction Structure, Cell Polarity, and Proliferation Control in. **134**, 1469–  
526 1482.
- 527 **Wu, V. M., Schulte, J., Hirschi, A., Tepass, U. and Beitel, G. J.** (2004). Sinuous is a  
528 *Drosophila* claudin required for septate junction organization and epithelial tube size  
529 control. *J. Cell Biol.* **164**, 313–323.
- 530 **J. Xu, F. Anuar, S. M. Ali, Y. N. Mei, D. C. Y. Phua, and W. Hunziker.** (2009). Zona  
531 occludens-2 is critical for blood-testis barrier integrity and male fertility. *Molecular*  
532 *Biology of the Cell*, vol. **20**, no. 20, pp. 4268–4277, 2009.
- 533 **Zoller, R. and Schulz, C.** (2012). The *Drosophila* cyst stem cell lineage: Partners behind  
534 the scenes? *Spermatogenesis* **2**, 145–157.
- 535

536 **Figures and legends:**

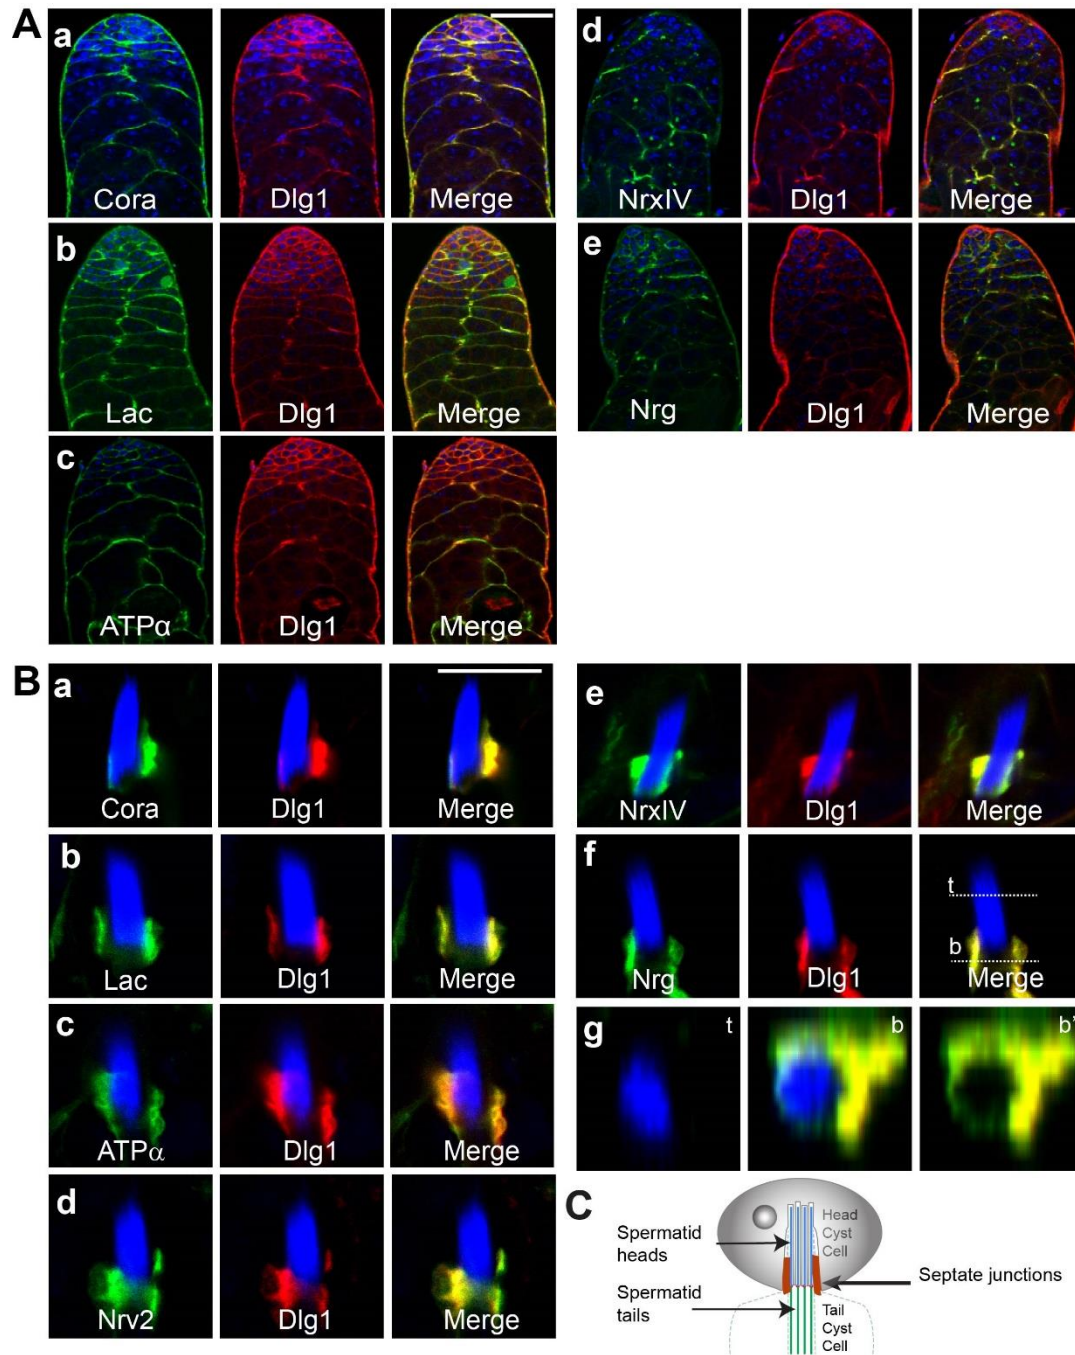

537

538

539 **Fig 1- Major components of the septate junction co-localize during early and late stages of**  
540 **spermatogenesis.**

541 **A)** Apical tips of testes showing co-localization of the SJ proteins - Lac-GFP (**b**), ATP $\alpha$ -GFP (**c**),  
542 Nrx-IV-GFP (**d**) and Nrg-GFP (**e**) - with Dlg1 (red) immunostaining at the interface of the germline  
543 and somatic cells. Testis from the Dlg1GFP (red) stock was immunostained with anti-Cora (green)  
544 (**a**). All specimen were stained with the Hoechst dye (blue) marking the nuclei. (Scale-50  $\mu$ m)

545 **B)** The SJ proteins also localize near the compact nuclei bundle (NB) of the mature spermatids  
546 during the late stages. Hoechst staining, marking all nuclei, is in blue. (**g**) depicts X-Z digital  
547 section through the top (t) and bottom (b) parts of the specimen shown in **f**, indicating that the SJ  
548 proteins localize all around the NB. (Scale-10  $\mu$ m)

549 **C)** Schematic describes the position of the junction, between the head and tail cyst cells.

550

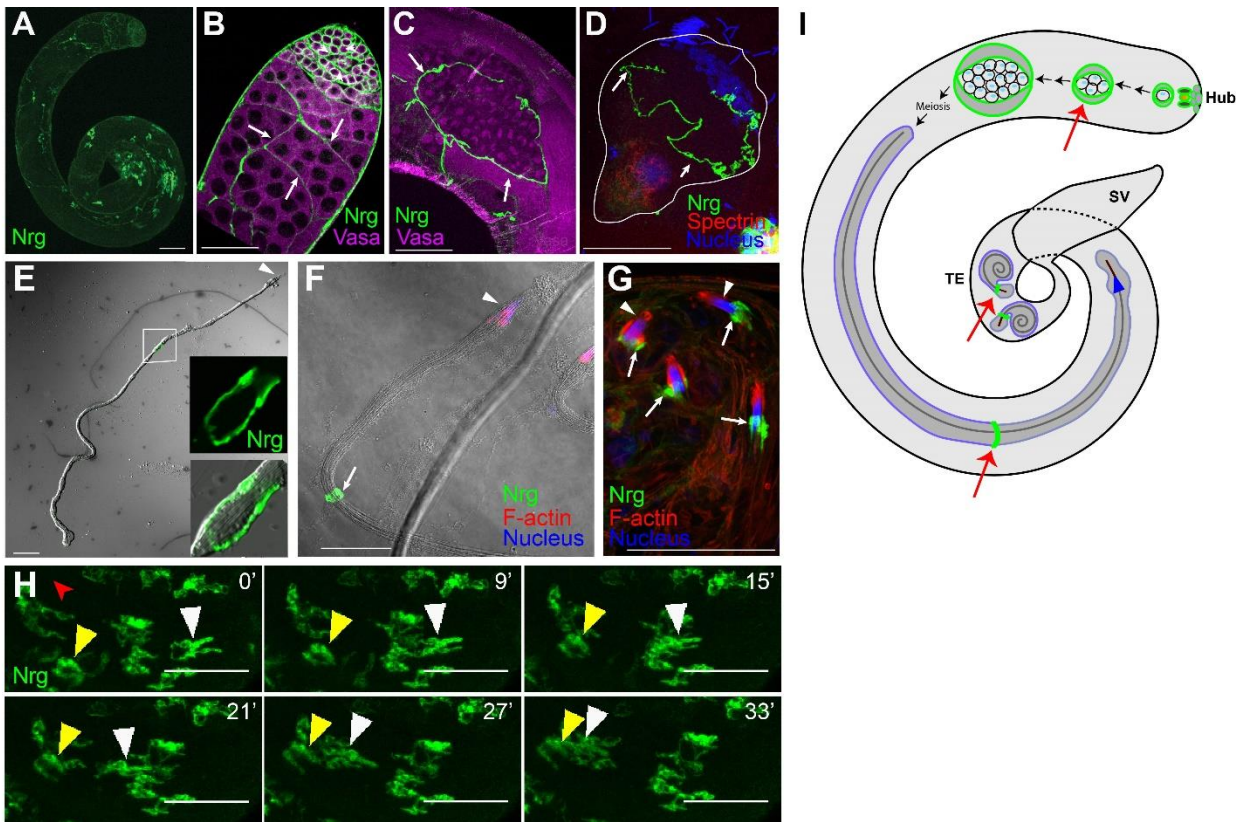

551

552 **Fig 2- Morphogenesis of the SJ protein Nrg during spermatogenesis**

553 **A-C)** Two-day-old Nrg-GFP (green) testes stained with the anti-Vasa antibody (magenta). **(A)**  
 554 Low magnification image of Nrg-GFP testis shows the presence of Nrg at different stages. **(B)**  
 555 Apical end of the testis shows Nrg-GFP localization around individual spermatogonia  
 556 (arrowheads) at the initial stage. It is then restricted to the cyst perimeter (arrows) of the primary  
 557 spermatocyte stages. **(C)** A post-meiotic cyst shows the presence of Nrg-GFP along the cyst  
 558 perimeter. Nrg-GFP is excluded from the germ cell perimeter inside the cyst enclosure from the  
 559 spermatocyte stage onwards.

560 **D-F)** Squash preparation Nrg-GFP testes immunostained with the anti-Spectrin antibody (red, **D**),  
 561 Hoechst dye (blue) and Phalloidin (red; **F**). **(D)** An early elongating cyst (outlined by white  
 562 boundary) shows polarization of the spermatid nuclei (blue) and tails (red), and localization of  
 563 Nrg-GFP (arrows) at the HCC-TCC interface. **(E-F)** Elongated spermatid cysts from Nrg-GFP  
 564 testis were isolated and stained for the F-actin cone (red) and nucleus (blue) marking the rostral  
 565 ends (arrowheads). The HCC and TCC are highly extended at this stage, and a condensed form  
 566 of Nrg-GFP (arrows) between these two cells was seen in the middle region.

567 **G)** Coiled stage spermatids from Nrg-GFP testis, stained for F-actin (red) and nucleus (blue). The  
568 arrow indicates localization of the Nrg (arrow) near the spermatid nuclei bundle (arrowhead, blue).  
569 Note that the position of the Nrg-GFP has changed post individualization.

570 **H)** Time-lapse images of Nrg-GFP testis shows the movement of Nrg-GFP structure (yellow and  
571 white arrowheads) towards basal end of the testis. The red arrowhead shows the location of the  
572 SV. (Scale-50  $\mu$ M for all panels)

573 **I)** Schematic illustrates the morphogenesis of domains marked by SJ proteins in adult testis.  
574 Schematic is not to scale.  
575

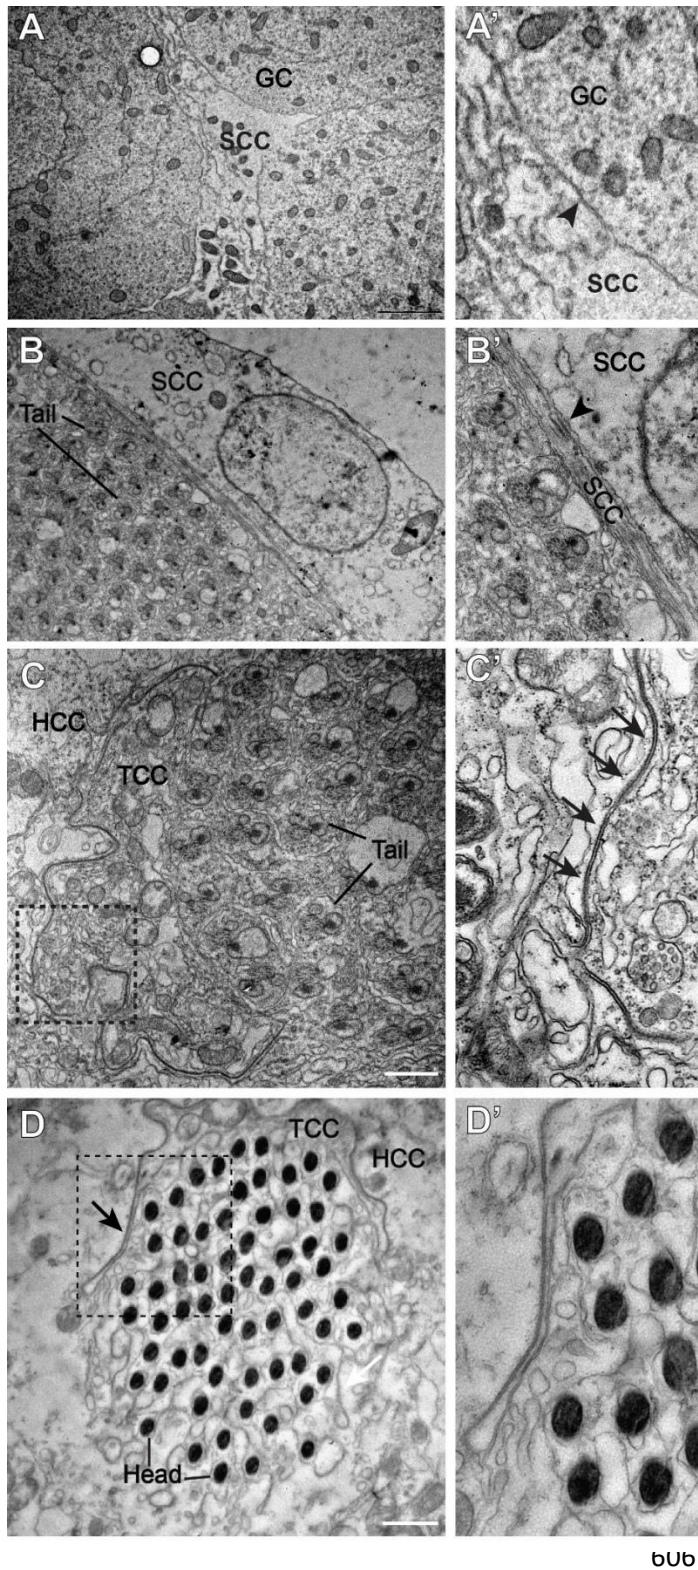

**Fig 3- Ultrastructural analysis of the germ-soma and soma-soma interfaces in adult testis.**

**A)** Electron micrograph of the spermatogonial stages shows a somatic cyst cell (SSC) and germ cells (GC). The junction between the SSC and GC (arrowhead) is seen (**A'**).

**B)** Section through an elongated cyst, as can be identified by the spermatid tails with major and minor mitochondria, along with associated SSC. Note that the junction between the SSCs does not resemble an SJ (arrowhead, **B'**).

**C)** Electron micrograph through the tails of a more mature, pre-individualized cyst shows the presence of a septa-like pattern between the two surrounding cyst cells. **C'** shows the magnified image of the boxed region in **C**. Arrows indicate a clear ladder-like septate junction between the membranes of the two somatic cyst cells.

**D)** Section through the spermatid heads at the coiled stages, with surrounding HCC and TCC. **D'** shows a magnified image of the boxed region in **D**. Ladder-like arrangement of SJ between the two cyst cells can be seen around the sperm head. Note that similar to the results obtained by confocal microscopy, the

607 junction has relocated just caudal to the sperm heads. (Scale-1  $\mu$ M)

608



609

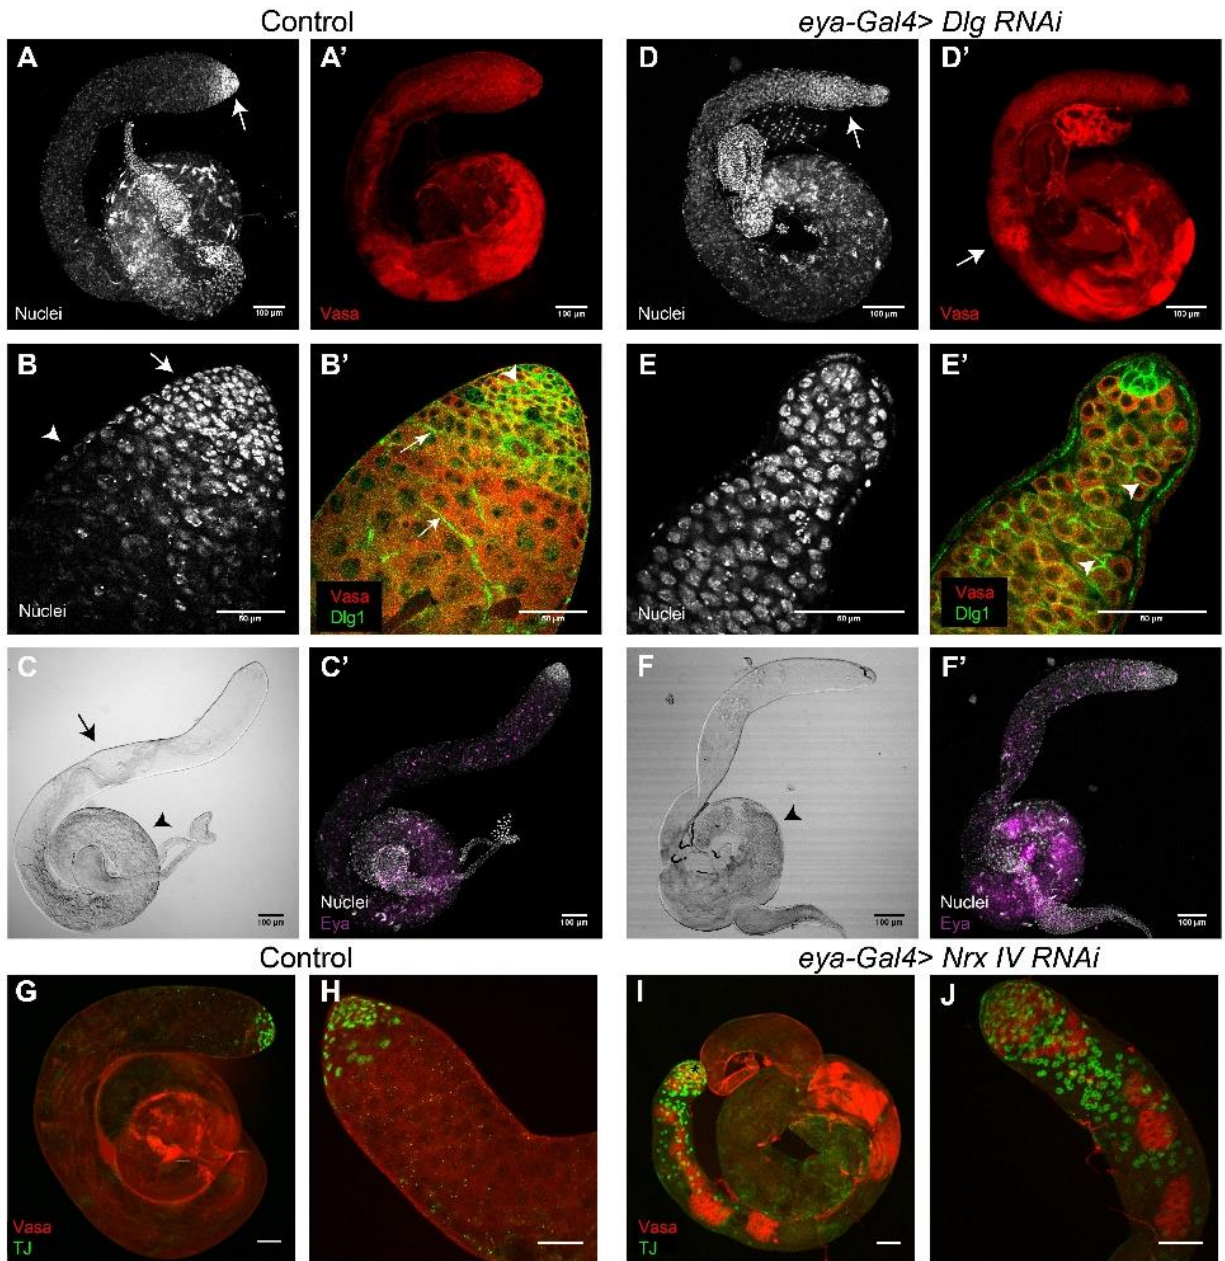

610

611

612 **Fig 4- Knockdown of Dlg 1 and NrX-IV during spermatogonial stages leads to a**  
613 **defect in proliferation and differentiation**

614 **A-B')** Control (*eya-Gal4> dsGFP*) testis stained with the Hoechst dye (white), Dlg1 (green) and  
615 Vasa (red). **(A)** Hoechst staining shows tightly packed, condensed nuclei at the apical tip (arrow).  
616 **(A')** Vasa pattern in control testis. **(B)** High magnification image of the apical tip shown in **(A)**.

617 Arrow marks the condensed nuclear staining of mitotically active cells, while arrowhead marks  
618 the transition to meiotic stages, as indicated by comparatively less intense nuclear staining. **(B')**  
619 Dlg 1 (green) localizes at the membranes of the SSCs, surrounding the germ cells, as indicated  
620 by Vasa (red).

621 **C)** DIC image indicates the presence of elongated/ individualized tails (arrow), as well as coiled  
622 tails (arrowhead).

623 **C')** Control testis shows the distribution of *eya* (magenta) positive somatic cyst cells.

624 **D-E')** *eya-Gal4 > Dlg RNAi* testis stained with the Hoechst dye (white), Dlg1 (green) and Vasa  
625 (red). **(D)** The spatially distinct localization of the mitotic clusters is lost in *eya-Gal4 > dsDlg1* testis.  
626 Brightly stained mitotic nuclei can be seen extending until the middle region of the testis. **(D')**  
627 Pockets of Vasa staining, usually restricted more apically, extend until the middle region of the  
628 testes (arrow). **(E)** High magnification image of the apical tip of the testis shown in **(D)**. Note that  
629 the apical tip looks shrunk, as compared to control testes in **(B)**. **(E')** Dlg1 staining (green) is lost  
630 from around the germ cells (red; Vasa). Arrowhead indicates Dlg staining around the germ cells.

631 **F)** DIC image indicates a lack of elongated/individualized tails and a decrease in the density of  
632 coiled tails (arrowhead)

633 **F')** *eya-Gal4 > Dlg RNAi* testis shows the distribution of *eya* (magenta) positive somatic cyst cells.  
634 Distribution of the *eya*-positive cells is similar to control.

635 **G-H)** Control (Wild-type) testis stained with anti-Vasa (red) and anti-TJ (green) antibodies. **(G)**  
636 The restricted pattern of TJ-expressing somatic cells at the apical tip of the testis (marked by an  
637 asterisk). **(H)** High magnification of the apical tip of a control testis.

638 **I-J)** *eya-Gal4 > dsNrX-IV* testis stained with anti-Vasa (red) and anti-TJ (green) antibodies. **(I)**  
639 Patchy expression of Vasa indicates defects in proliferation. TJ-positive cells are no longer  
640 restricted at the apical tip (asterisk) of the testis. **(J)** Higher magnification of the apical tip of *eya-*  
641 *Gal4 > dsNrX-IV* testis. Also note that the apical tip appeared shrunk, similar to what was seen  
642 upon knockdown of Dlg 1.

643 The scale bars indicate 50  $\mu$ M unless specified otherwise on the image.

644

645

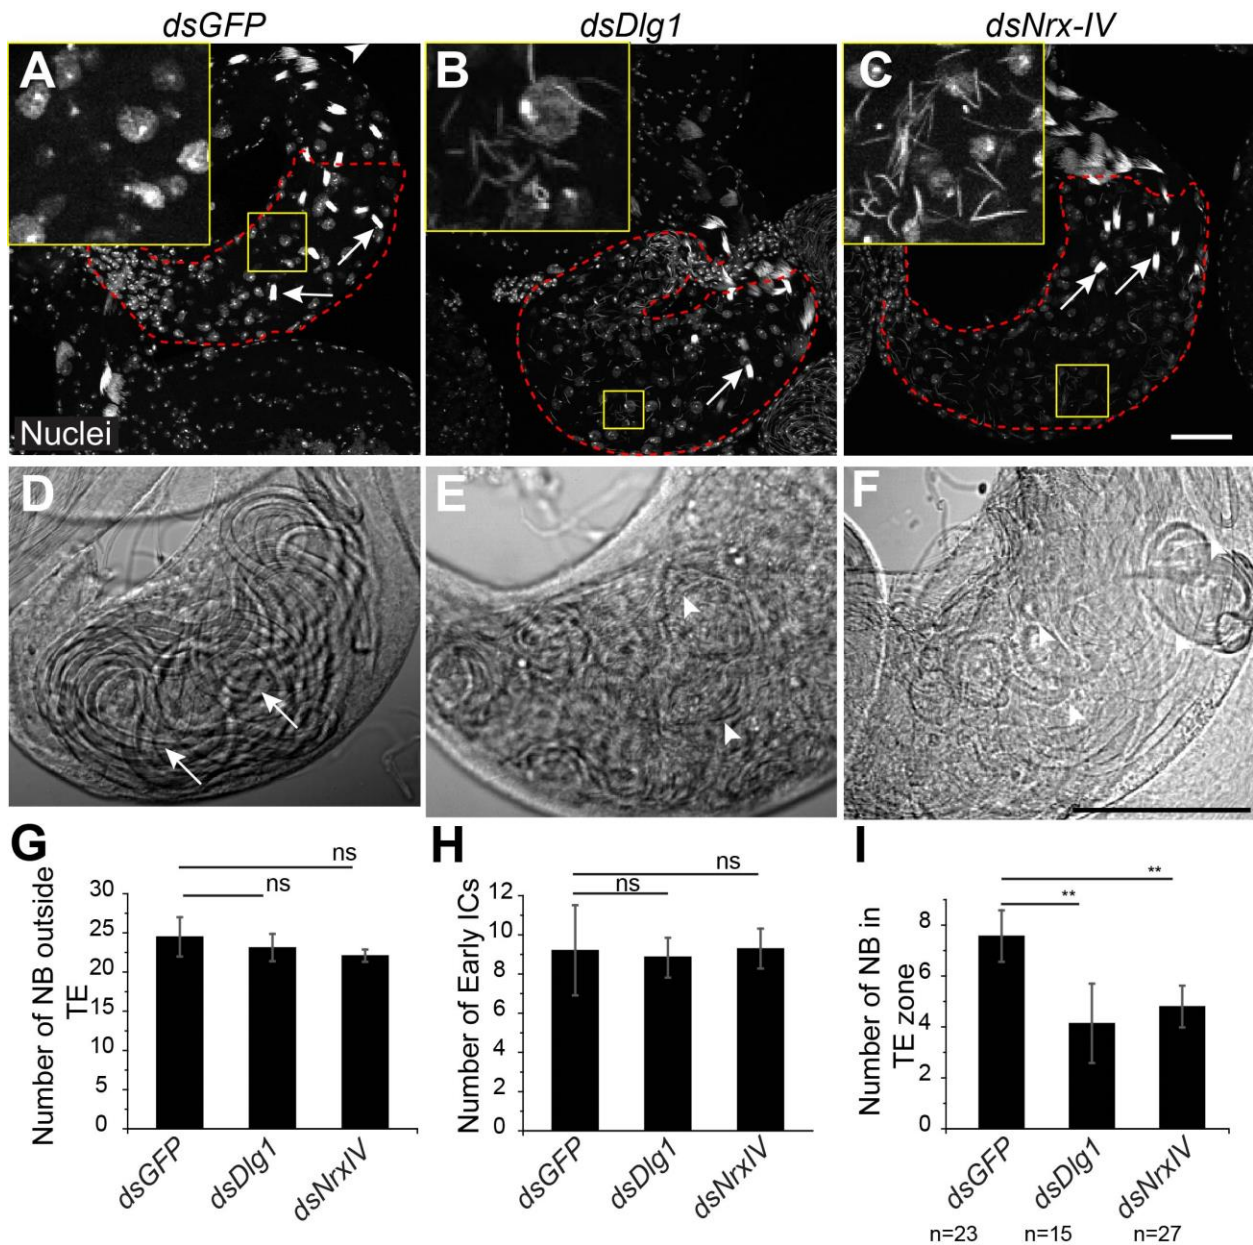

646

647 **Fig 5- Knockdown of SJ components in the cyst cells during late stages affects NB**  
 648 **integrity and spermatid coiling**

649 **A)** Control (*PpY-Gal4 > dsGFP*) testes stained with Hoechst (white) to mark the nuclei. Compact  
 650 bundles of spermatid nuclei (arrows) are seen in the TE region (red dashed outline). The inset  
 651 shows that no single spermatid heads can be seen. **B-C)** *PpY-Gal4 > dsDlg1* and *PpY-Gal4 >*  
 652 *dsNrX-IV* testes, respectively, stained with the Hoechst dye. A few intact bundles of spermatid

653 heads (arrows) can be seen in the TE zone (red dashed outline). Unusually large number of  
654 disrupted single spermatid heads were found inside these testes (insets).

655 **D-F)** Bright-field images show the basal end of Control (**D**), *PpY-Gal4*> *dsDlg1* (**E**) and *PpY-*  
656 *Gal4*> *dsNrxIV* (**F**) testes. The arrows indicates intact coiled bundle present in the control testis  
657 while arrowheads point towards the disrupted bundle in the RNAi backgrounds.

658 **G-I)** Histograms show quantifications of intact NBs (mean±s.d.) outside TE (**G**), number  
659 (mean±s.d.) of early ICs (mean±s.d.) (**H**), and the number (mean±s.d.) of NBs inside the TE (**I**)  
660 in the Control, *PpY-Gal4* > *dsDlg1* and *PpY-Gal4*> *dsNrxIV* testes. P-value (\*\*<0.01) was  
661 calculated using the Mann-Whitney U test. (Scale-50 µM)

662

663

664

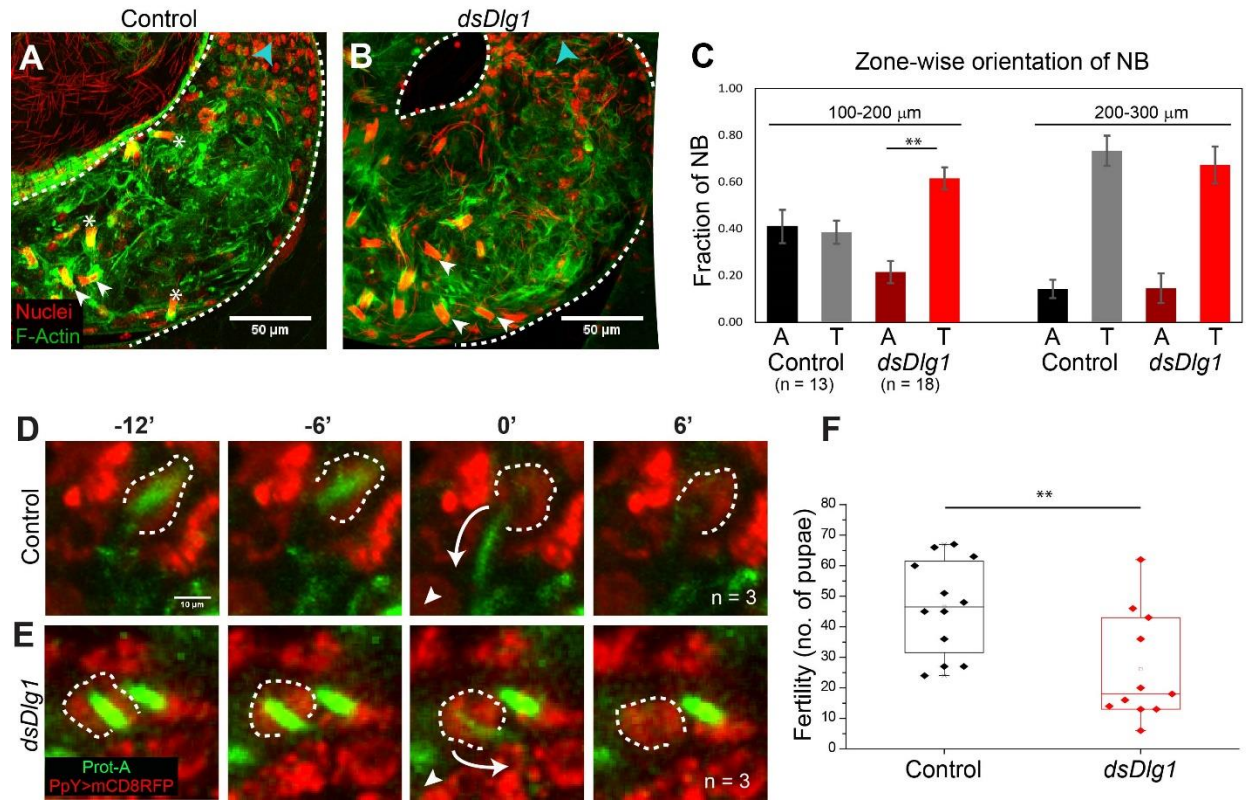

665

666

667 **Fig 6- Dlg1 loss from the HCC-TCC interface at the coiling stage causes**  
 668 **premature sperm release inside the testis**

669 **A-B)** NB orientations in control **(A)** (*PpY-Gal4> dsGFP*) and *PpY-Gal4> dsDlg1* **(B)** testes. Testes  
 670 were stained with the Hoechst dye (red) and Phalloidin (green), and the position of the actin cap  
 671 was used as an indicator of whether the NBs were facing towards (white arrowhead) or away  
 672 (asterisk) from the SV (direction of SV marked by blue arrowhead). Note the decrease in bundles  
 673 facing away from SV in 100-200 μm region in **B**.

674 **C)** Zone-wise distribution and the orientation of NBs (mean±s.e.m.) in the TE region. Distances  
 675 from the SV were measured from the proximal end of the testicular duct. 'A' denotes the NB  
 676 orientation away from SV, and 'T' denoted orientations towards the SV. P-value (\*\*<0.01) was  
 677 calculated using the Mann-Whitney U test. Apart from these two classes a fraction of NBs was  
 678 found with intermediate orientations that were not included in the graph. Spermatids exit testis in  
 679 the 'A' orientation (Dubey et al., 2016).

680 **D-E)** Time series from live imaging of the testes. Protamine A (green) marks spermatid head,  
681 while mCD8-RFP (red) marks cyst cell (dashed outline). In Control (*ProtA-GFP/UAS-Dicer; PpY-*  
682 *Gal4> UAS-mCD8 RFP*) (**D**), spermatids heads are released (white arrow at time 0') in the  
683 direction of the SV (indicated by white arrowhead). In the *dsDlg1* testes (*ProtA-GFP/UAS-dsDlg1;*  
684 *PpY-Gal4>UAS-mCD8 RFP*) (**E**), spermatid heads are released in the TE region (white arrow at  
685 time 0'), even though the cyst has not turned to face away from the SV.

686 **F)** Box plots depict the number of pupae produced by individual Control (*PpY-Gal4> dsGFP*) and  
687 *PpY-Gal4> dsDlg1* males in 24 hours. P-value (\*\*<0.01) was calculated using the Mann-Whitney  
688 U test.
